## $\alpha_2$ -Adrenergic Receptors in Human Dorsal Root Ganglia

### Predominance of $\alpha_{2b}$ and $\alpha_{2c}$ Subtype mRNAs

Rita R. S. Ongjoco, D.O.,\* Charlene D. Richardson, Ph.D.,† Xiaowen L. Rudner, Ph.D.,‡  
Mark Stafford-Smith, M.D.,§ Debra A. Schwinn, M.D.¶

**Background:** Nonselective  $\alpha_2$ -adrenergic receptor ( $\alpha_2$ AR) agonists (e.g., clonidine) mediate antinociception in part through  $\alpha_2$ ARs in spinal cord dorsal horn; however, use of these agents for analgesia in humans is limited by unwanted sedation and hypotension. The authors previously demonstrated  $\alpha_{2a} \approx \alpha_{2b} \gg \alpha_{2c}$  mRNA in human spinal cord dorsal horn cell bodies. However, because 20% of dorsal horn  $\alpha_2$ ARs derive from cell bodies that reside in the associated dorsal root ganglion (DRG), it is important to evaluate  $\alpha_2$ AR expression in this tissue as well. Therefore, the authors evaluated the hypothesis that  $\alpha_{2b}$  mRNA,  $\alpha_{2c}$  mRNA, or both are present in human DRG.

**Methods:** Molecular approaches were used to determine  $\alpha_2$ AR expression in 28 human DRGs because of low overall receptor mRNA expression and small sample size. After creation of synthetic competitor cDNA and establishment of am-

plification conditions with parallel efficiencies, competitive reverse transcription polymerase chain reaction was performed using RNA isolated from human DRG.

**Results:** Overall expression of  $\alpha_2$ AR mRNA in DRG is low but reproducible at all spinal levels.  $\alpha_{2b}$  and  $\alpha_{2c}$ AR subtype mRNAs predominate ( $\alpha_{2b} \approx \alpha_{2c}$ ), accounting for more than 95% of the total  $\alpha_2$ AR mRNA in DRG at all human spinal nerve root levels.

**Conclusions:** Predominance of  $\alpha_{2b}$  and  $\alpha_{2c}$ AR mRNA in human DRG is distinct from  $\alpha_2$ AR mRNA expression in cell bodies originating in human spinal cord dorsal horn, where  $\alpha_{2a}$  and  $\alpha_{2b}$  predominate with little or absent  $\alpha_{2c}$  expression. These findings also highlight species heterogeneity in  $\alpha_2$ AR expression in DRG. If confirmed at a protein level, these findings provide an additional step in unraveling mechanisms involved in complex neural pathways such as those for pain. (Key words: Anesthesiology; intensive care; nociception; spinal cord.)

This article is accompanied by an Editorial View: Please see: Maze M, Fujinaga M:  $\alpha_2$  Adrenoceptors in pain modulation: Which subtype should be targeted to produce analgesia? ANESTHESIOLOGY 2000; 92:934-6.

\* Critical Care Fellow, Department of Pediatrics.

† Postdoctoral Fellow, Department of Anesthesiology.

‡ Postdoctoral Fellow, Department of Anesthesiology.

§ Assistant Professor, Department of Anesthesiology.

¶ Professor, Department of Anesthesiology, Pharmacology/Cancer Biology, and Surgery; Senior Fellow, Center for the Study of Aging and Human Development.

Received from the Duke University Medical Center, Durham, North Carolina. Submitted for publication May 28, 1999. Accepted for publication September 30, 1999. Supported in part by grants HL49103 and AG00745 from the National Institutes of Health, Bethesda, Maryland (Dr. Schwinn). Funding for tissues obtained from the Duke Rapid Autopsy Program, Durham, North Carolina, was provided by the National Institutes of Health, grant AG05128, and by a grant from Glaxo-Wellcome, Research Triangle Park, North Carolina.

Address reprint requests to Dr. Schwinn: Professor of Anesthesiology, Surgery, and Pharmacology/Cancer Biology, Box 3094, Department of Anesthesiology, Duke University Medical Center, Durham, North Carolina. Address electronic mail to: Schw001@mc.duke.edu

MANAGEMENT of acute and chronic pain is important for clinicians in many subspecialties. Despite their potent analgesic effect, many available antinociceptive agents have unwanted properties, including respiratory depression, platelet dysfunction, and tolerance. Analgesia from  $\alpha_2$ -adrenergic receptor ( $\alpha_2$ AR) agonists has been shown in animals<sup>1-4</sup> and humans,<sup>5-8</sup> including patients who have become tolerant to opioids.<sup>9-11</sup> Because  $\alpha_2$ AR agonists are relatively free of side-effects, they have been suggested as an attractive alternative to available analgesic agents; however, clinical use of  $\alpha_2$ AR agonists remains limited by sedation and hypotension. Furthermore, the exact role of  $\alpha_2$ ARs in modulating human pain remains to be determined.

Three distinct human  $\alpha_2$ AR subtypes ( $\alpha_{2a}$ ,  $\alpha_{2b}$ ,  $\alpha_{2c}$ ) have been described.<sup>#12-14</sup> Intracellular effects of  $\alpha_2$ AR agonists include inhibition of adenylyl cyclase, inhibition of voltage-sensitive  $Ca^{2+}$  channels, and enhancement of

# The rat homolog of the human  $\alpha_{2a}$ AR is called the  $\alpha_{2d}$ AR; this is because a single amino acid change gives it slightly different pharmacology, even though it is the same gene product. For purposes of this manuscript (to avoid confusion), the term  $\alpha_{2a}$ AR will be used for the human receptor and homologous gene products in other species.

K<sup>+</sup> channel opening; these effects cause suppression of neurotransmitter release and neuronal firing at locations in brain and spinal cord associated with antinociception.<sup>15-19</sup> In addition,  $\alpha_2$ AR activation has been shown to inhibit calcitonin gene-related peptide expression in cultured dorsal root ganglia (DRG) neurons<sup>20</sup>; this suggests a possible mechanism by which  $\alpha_2$ ARs may decrease inflammation and vasodilation. During the past 5 yr, various studies designed to determine physiologic actions mediated by distinct  $\alpha_2$ AR subtypes have been performed in cell culture and whole animals. Experiments using knockout mice reveal that specific  $\alpha_2$ AR subtypes mediate murine sedation, centrally mediated hypotension, peripheral vasoconstriction, and temperature regulation.<sup>21-24</sup> Interestingly,  $\alpha_2$ AR subtype expression and function appears to be species specific.<sup>25-28</sup> We previously demonstrated predominance of  $\alpha_{2a}$  and  $\alpha_{2b}$ AR mRNA in human spinal cord dorsal horn, with minimal  $\alpha_{2c}$ AR expression in the lumbar region only.<sup>25</sup> However, because 20% of spinal cord dorsal horn  $\alpha_2$ ARs are contributed by neurons with cell bodies located in DRG,<sup>29</sup> it is important to evaluate  $\alpha_2$ AR subtype expression in human DRG as another possible site of action of  $\alpha_2$ AR subtype-selective drugs. Overall, DRG  $\alpha_2$ ARs are difficult to study because the small amounts of tissue result in extremely low levels of available protein and mRNA. We therefore used quantitative competitive reverse transcription polymerase chain reaction (RT-PCR) to test the hypothesis that heterologous  $\alpha_2$ AR expression occurs in human DRG.

## Materials and Methods

### Human Tissues, Control Cells, and RNA Preparation

Human DRG was obtained with institutional approval from autopsy specimens (rapid and routine). DRG tissue samples were immediately frozen in liquid nitrogen and stored at  $-70^\circ\text{C}$  until assays were performed. Representative 5- $\mu$  cryostat sections were evaluated histologically with hematoxylin and eosin staining to confirm that tissues collected were DRG and not thickened portions of nerve roots. Total cellular RNA was extracted from DRG tissues based on the guanidinium thiocyanate-phenol-chloroform method originally described by Chomczynski and Sacchi<sup>30</sup> using RNA STAT-60 (TEL-TEST "B" Inc., Friendswood, TX). As a positive control for final RT-PCR, RNA was also extracted from other human tissues (vena cava and aorta) known to express all three human  $\alpha_2$ AR mRNA subtypes.<sup>14,31</sup>

**Table 1. Human  $\alpha_2$ AR Primers for Qualitative and Quantitative RT-PCR**

| $\alpha_2$ AR Primers   | Nucleotide Sequence 5'→3' | Primer Position Relative to cDNA | No. of Bases Amplified |
|-------------------------|---------------------------|----------------------------------|------------------------|
| $\alpha_{2a}$ sense     | AAACCTCTTCCTGGTGTCTC      | 204-223                          |                        |
| $\alpha_{2a}$ antisense | AGACGAGCTCTCCTCCAGGT      | 875-894                          | 691                    |
| $\alpha_{2b}$ sense     | CCTGGCCTGCAGCATCGGAT      | 519-538                          |                        |
| $\alpha_{2b}$ antisense | ATGACCACAGCCAGCACGAA      | 1111-1130                        | 612                    |
| $\alpha_{2c}$ sense     | GTGGTGATCGCCGTGCTGAC      | 214-233                          |                        |
| $\alpha_{2c}$ antisense | CGTTTTCGGTAGTCGGGGAC      | 767-786                          | 573                    |

$\alpha_2$ AR =  $\alpha_2$ -adrenergic receptor; RT-PCR = reverse transcription polymerase chain reaction.

In addition to tissue controls, cells containing each  $\alpha$ AR subtype (Chinese hamster ovary cells stably expressing individual human  $\alpha_2$ AR subtypes and rat-1 fibroblasts expressing human  $\alpha_1$ AR subtypes) were used as positive and negative controls, respectively, to test for specificity and sensitivity of  $\alpha_2$ AR primers used in RT-PCR. Chinese hamster ovary cells were grown as monolayers in F-12 Nutrient mixture (Ham, Gibco/BRL, Gaithersburg, MD) supplemented with 10% fetal bovine serum, penicillin (100 U/ml), streptomycin (100  $\mu\text{g}/\text{ml}$ ), and G418 (500  $\mu\text{g}/\text{ml}$ ) in 5% CO<sub>2</sub> at 37°C. Rat-1 fibroblasts were grown similarly in Dulbecco's modified Eagle medium. RNA was extracted from these control cells using the protocol described previously, with final RNA pellets resuspended in ribonuclease-free water, and the RNA was quantitated using a spectrophotometer at 260 and 280 nm and stored at  $-70^\circ\text{C}$  for later use.

### Qualitative Reverse Transcription Polymerase Chain Reaction

To determine the presence or absence of specific  $\alpha_2$ AR mRNAs in human DRG, qualitative RT-PCR was performed initially. Human  $\alpha_2$ AR subtype-specific primers were synthesized at Duke University Medical Center. Sense and antisense primers (20 mer) were adapted from Eason and Liggett<sup>31</sup> with some modifications, as shown in table 1. Using GeneAmp RNA PCR Core Kit (Perkin Elmer, Foster City, CA), RT of 1  $\mu\text{g}$  RNA was performed in a 20- $\mu\text{l}$  reaction mixture containing a final concentration of 5 mM MgCl<sub>2</sub>; 50 mM KCl; 10 mM Tris-HCl; 1 mM each of dGTP, dATP, dTTP, and dCTP; 20 U ribonuclease inhibitor; 50 U Muloney leukemia virus RT; and 2.5  $\mu\text{M}$  random hexamers. As a negative control, reactions without RT were performed to ensure that contamination with genomic DNA did not occur. RT reactions were run for 60 min at 42°C, 10 min at 95°C, and 10 min at 4°C.

**Table 2. Primers Used in Constructing Human  $\alpha_2$ AR Subtype-Specific Competitor Templates**

| Competitor $\alpha_2$ AR Primers | Nucleotide Sequence 5'→3'      |                      |
|----------------------------------|--------------------------------|----------------------|
|                                  | $\alpha_2$ AR Subtype Sequence | pGEM-7Zf(+) Sequence |
| $\alpha_{2a}$ sense              | AAACCTCTTCTGGTGTCTC            | CTTACCGCTGTTGAGATCCA |
| $\alpha_{2a}$ antisense          | AGACGAGCTCTCCTCCAGGT           | GACTCTTGTTCCAAAGTGA  |
| $\alpha_{2b}$ sense              | CCTGGCCTCCAGCATCGGAT           | CTTACCGCTGTTGAGATCCA |
| $\alpha_{2b}$ antisense          | ATGACCACAGCCAGCAAGAA           | GACTCTTGTTCCAAAGTGA  |
| $\alpha_{2c}$ sense              | GTGCTGATCGCCGTGCTGAC           | CTTACCGCTGTTGAGATCCA |
| $\alpha_{2c}$ antisense          | CGTTTTCCGGTAGTCGGGGAC          | GACTCTTGTTCCAAAGTGA  |

$\alpha_2$ AR =  $\alpha_2$ -adrenergic receptor.

The resulting mixture was then amplified by PCR in a 100- $\mu$ l reaction mixture containing a final concentration of 2 mM MgCl<sub>2</sub>; 50 mM KCl; 10 mM Tris-HCl; 200  $\mu$ M each of dGTP, dATP, dTTP, and dCTP; 2.5 U AmpliTaq DNA polymerase; 0.4  $\mu$ M each of  $\alpha_2$ AR sense and antisense primers; and 10% dimethyl sulfoxide. PCRs were performed using the Twin Block System Easy Cycler Series (ERICOMP, San Diego, CA). Optimal amplification conditions for human DRG were determined to be 3 min at 95°C; 35 cycles of 1 min denaturation at 95°C; 1 min annealing (57°C for  $\alpha_{2a}$ , 65°C for  $\alpha_{2b}$ , and 60°C for  $\alpha_{2c}$ ); and 1 min extension at 72°C. Final PCR products (10  $\mu$ l) were separated by size electrophoretically through an agarose gel (1%) and visualized using ethidium bromide staining. Amplified products were confirmed to contain specific  $\alpha_2$ AR target by DNA sequencing using the *fmol* DNA Sequencing System (Promega Corporation, Madison, WI).

#### Quantitative Competitive Reverse Transcription Polymerase Chain Reaction

**Synthesis of Competitor Template.** After the presence or absence of  $\alpha_2$ AR subtypes in human DRG was established and general PCR conditions determined, quantitative competitive PCR was performed. For the heterologous competitor template, a sequence from the plasmid pGEM-7Zf(+) (Promega) was used. The use of a competitor rather than native DNA has the advantage of minimizing differences in GC content between subtypes, because it should be amplified with equal efficiency in each reaction. Using  $\alpha_2$ AR sense and antisense primers to flank the pGEM-7Zf(+) sequence, competitor primers (40 mer) were constructed as shown in table 2. Using 9 ng pGEM-7Zf(+) in a final volume of 100  $\mu$ l containing the PCR mixture (described previously) and 0.5  $\mu$ l of each of the sense and antisense competitor primers, a 540-base pair (bp) product (20 bp on either end corresponding to the  $\alpha_2$ AR subtype-specific primers) was

amplified corresponding to pGEM-7Zf(+) nucleotides 2,021–2,520.<sup>32</sup> Conditions for amplification were 3 min at 95°C; 40 cycles of 30 s denaturation at 95°C and 30 s annealing at 58°C; and 1 min extension at 72°C. Final PCR products were separated by size on a 1% agarose gel and visualized using ethidium bromide staining.

Final construction of a human  $\alpha_2$ AR subtype-specific plasmid was accomplished by ligating 1  $\mu$ l of the PCR product (with deoxyadenosine 3' overhangs produced by *Taq* polymerase) into 50 ng of the pCR 2.1 vector (which has 3' deoxythymidine residues) in a final volume of 10  $\mu$ l using the Original TA Cloning Kit (Invitrogen Corp., Carlsbad, CA); the product was subsequently transformed into INV $\alpha$ F' cells. To analyze and confirm successful transformation, isolated plasmids were digested with *Eco*RI (which cleaves on either side of the competitor insert), and PCR was performed using the  $\alpha_2$ AR subtype-specific 20-mer sense and antisense primers to amplify the competitor insert. Products from these reactions were visualized on a 1% agarose gel stained with ethidium bromide. These plasmids were used subsequently as templates to create competitor RNA transcripts.

To create competitor RNA transcripts, plasmids containing  $\alpha_2$ AR competitor sequence were linearized with *Hind*III (New England Biolabs, Inc., Beverly, MA), treated with proteinase K (Boehringer Mannheim, Indianapolis, IN) at 37°C for 30 min, extracted with phenol-chloroform, and precipitated with isopropanol. Single-stranded RNA competitor transcripts were then synthesized using T7 polymerase and MEGAscript reagents (Ambion, Inc., Austin, TX) according to the manufacturer's directions. Molecules of competitor RNA were calculated (discussed later), and yeast transfer RNA was added to each competitor dilution at a final concentration of 10 ng/ $\mu$ l to stabilize the concentration and prevent degradation. Competitor dilutions were stored at -70°C until use.

Molecules of competitor per microliter were calculated from the following relation:

$\text{g/M of competitor} = \text{number of bp of competitor RNA transcript} \times 325 \text{ d/bp}$

$\text{g/}\mu\text{l competitor (calculated from } \text{abs}_{260}) \div \text{g/M competitor} \times 6.02 \times 10^{23} \text{ (Avogadro number) molecules/M} = \text{molecules/}\mu\text{l competitor}$

**Amplification Efficiency.** To ensure that the amplification rate was identical for target and competitor species, amplification efficiency of each target  $\alpha_2$ AR subtype and the corresponding  $\alpha_2$ AR competitor was measured. Two to 5 ng  $\alpha_2$ AR target plasmid and the corresponding competitor plasmid were coamplified in a final volume of 100  $\mu\text{l}$  PCR reaction mixture using  $\alpha_2$ AR sense and antisense primers (table 1). Amplification conditions were as described previously in the general RT-PCR section. For each  $\alpha_2$ AR subtype, nine identical reactions were prepared and the appropriate sample removed every five cycles (0–40 cycles) and placed on ice. PCR products (5  $\mu\text{l}$ ) were separated on a 3% NuSieve GTG agarose gel (FMC BioProducts, Rockland, ME) and stained with ethidium bromide. By design, amplified target and competitor species could be distinguished on the basis of difference in size (competitor size is 540 bp; see table 1 for  $\alpha_2$ AR subtype product size).

#### *Final Competitive Reverse Transcription Polymerase Chain Reactions*

For final competitive RT-PCRs, serial dilutions ( $10^8$ – $10^2$  molecules) of the competitor templates were added to a series of RT reaction tubes containing 0.5  $\mu\text{g}$  of total cellular RNA from human DRG in a final 10- $\mu\text{l}$  reaction mixture; final reagent concentrations were 5 mM  $\text{MgCl}_2$ ; 50 mM KCl; 10 mM Tris-HCl; 1 mM each of dGTP, dATP, dTTP, and dCTP; 10 U ribonuclease inhibitor; 25 U Muloney leukemia virus RT; and 2.5  $\mu\text{M}$  random hexamers. RT reactions were performed as described previously in the general RT-PCR section and subsequently amplified by PCR in a total volume of a 50- $\mu\text{l}$  reaction mixture; final concentrations were 2 mM  $\text{MgCl}_2$ ; 50 mM KCl; 10 mM Tris-HCl; 200  $\mu\text{M}$  each of dGTP, dATP, dTTP, and dCTP; 1.25 U AmpliTaq DNA polymerase; 0.4  $\mu\text{M}$  each of  $\alpha_2$ AR sense and antisense primers, and 10% dimethyl sulfoxide). Amplification conditions also were identical to those described previously in the general section concerning RT-PCR. Final PCR products (5–10  $\mu\text{l}$ ) were separated by size on a 3% NuSieve GTG agarose gel and visualized using ethidium bromide staining. Unlike qualitative PCR, in which relative quantitation necessitates use of the linear portion of the amplification

efficiency curve, in competitive PCR, the ratio of target to competitor remains constant throughout amplification; thus, valid quantitation continues into the plateau portion of amplification. Therefore, we used 35 cycles to optimize product visualization on the gel for capture by the digital camera.

#### *Data Analysis*

To determine amplification efficiency and competitive RT-PCR results, final gels were photographed using a DC-40 digital camera (Eastman Kodak Co., Rochester, NY). Band intensity was analyzed using Digital Science 1D Image Analysis software (Eastman Kodak Co.). Pixel data were exported and graphed using Microsoft Excel (Microsoft Corp., Seattle, WA). For the amplification efficiency curve, the logarithm of band intensity for the target and the competitor ( $y$ -axis) were graphed as a function of the number of cycles ( $x$ -axis). The slope of the linear portion of the curve (representing efficiency of amplification) was then compared for the two curves. For competitive RT-PCR, the logarithm of the ratio of the target and competitor products ( $y$ -axis) was graphed as a function of the logarithm of the initial amount of competitor molecules ( $x$ -axis) added to the reactions. The values obtained for band intensity were corrected for the difference in size between the target and the competitor (*i.e.*, the band intensity of the target was divided by the ratio of target size to competitor size). The amount of initial target molecules present was determined from the intersection of the curves (the  $x$ -intercept where target and competitor were equal [ $\log_{10} 1 = 0$ ]; this  $\log_{10}$  number, extrapolated from the curve, was then converted back to a real number to yield the number of molecules of target).

#### *Statistical Analysis*

Because DRG was obtained at variable intervals from death in each patient, potentially, more RNA degradation may have occurred in some patients compared with others. Therefore, to normalize for absolute amount of starting RNA, final molecules of  $\alpha_2$ AR subtype mRNA from each patient were converted to percent of total  $\alpha_2$ AR mRNA present before comparison with other patients. Because data were not distributed normally, the Wilcoxon signed rank test (a nonparametric version of the paired  $t$  test) was used to determine differences in percentages of  $\alpha_2$ AR subtype expression in human DRG. These results were confirmed using a general estimating equation<sup>33,34</sup>;  $P < 0.05$  was defined as statistically sig-

nificant. Data are presented as the median [interquartile range] and reported to two significant figures.

## Results

### Human Dorsal Root Ganglia and Controls

Twenty-eight DRG samples were obtained from seven patients. Patient age ranged from 26–85 yr; all causes of death were unrelated to neurologic disease. Furthermore, no tissue was harvested from patients with indwelling epidural or spinal catheters or those who were administered long-term intravenous or intrathecal analgesic agents (e.g., opioids). Time between death and

DRG tissue harvest ranged from 2.5–20 h. No patient was administered medications known to activate or inhibit  $\alpha_2$ ARs.

### Control Reactions and Initial Qualitative Reverse Transcription Polymerase Chain Reactions

Specificity of  $\alpha_2$ AR PCR primers was confirmed by lack of amplified products in RT-PCRs using RNA isolated from stable cell lines that expressed either of the other two  $\alpha_2$ AR subtypes or all three  $\alpha_1$ AR subtypes (data not shown) and expression profile in human vena cava and aorta, which matched that previously described by our laboratory.<sup>14</sup> To ensure contaminating genomic DNA

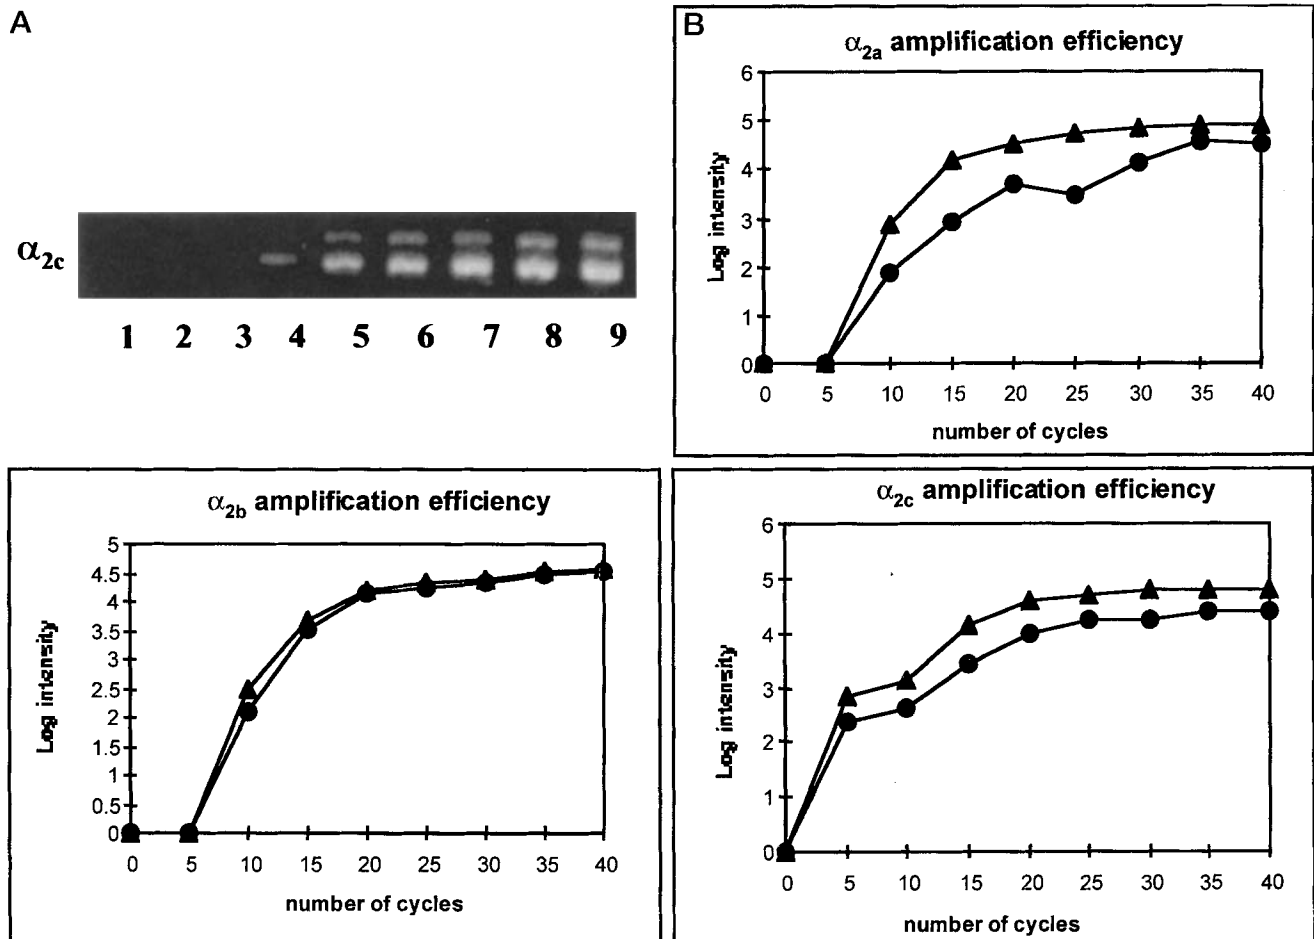

Fig. 1. Amplification efficiencies for target  $\alpha_2$ -adrenergic receptor ( $\alpha_2$ AR) subtype and corresponding competitor. (A) Representative agarose gel analysis of  $\alpha_{2c}$ AR subtype (upper band,  $\alpha_{2c}$  = 573 bp) and its competitor (lower band,  $\alpha_{2c}$  competitor = 540 bp). Polymerase chain reactions were removed from the cyclers every five cycles from 0 to 40 cycles; lane 1 represents zero cycles, lane 2 represents five cycles, and so forth (see text). (B) Log<sub>10</sub> of the band intensity of the products (y-axis) was graphed as a function of the number of cycles (x-axis). Slopes for each set of target  $\alpha_2$ AR subtype (●) and corresponding competitor (▲) were similar, indicating that the products were amplified with equal efficiency;  $\alpha_{2a}$ AR slope = 0.123,  $\alpha_{2a}$  competitor slope = 0.130;  $\alpha_{2b}$ AR slope = 0.122,  $\alpha_{2b}$  competitor slope = 0.122;  $\alpha_{2c}$ AR slope = 0.092,  $\alpha_{2c}$  competitor slope = 0.097.

$\alpha_{2b}$ - AND  $\alpha_{2c}$ -ADRENERGIC MRNAS IN HUMAN DORSAL ROOT GANGLIA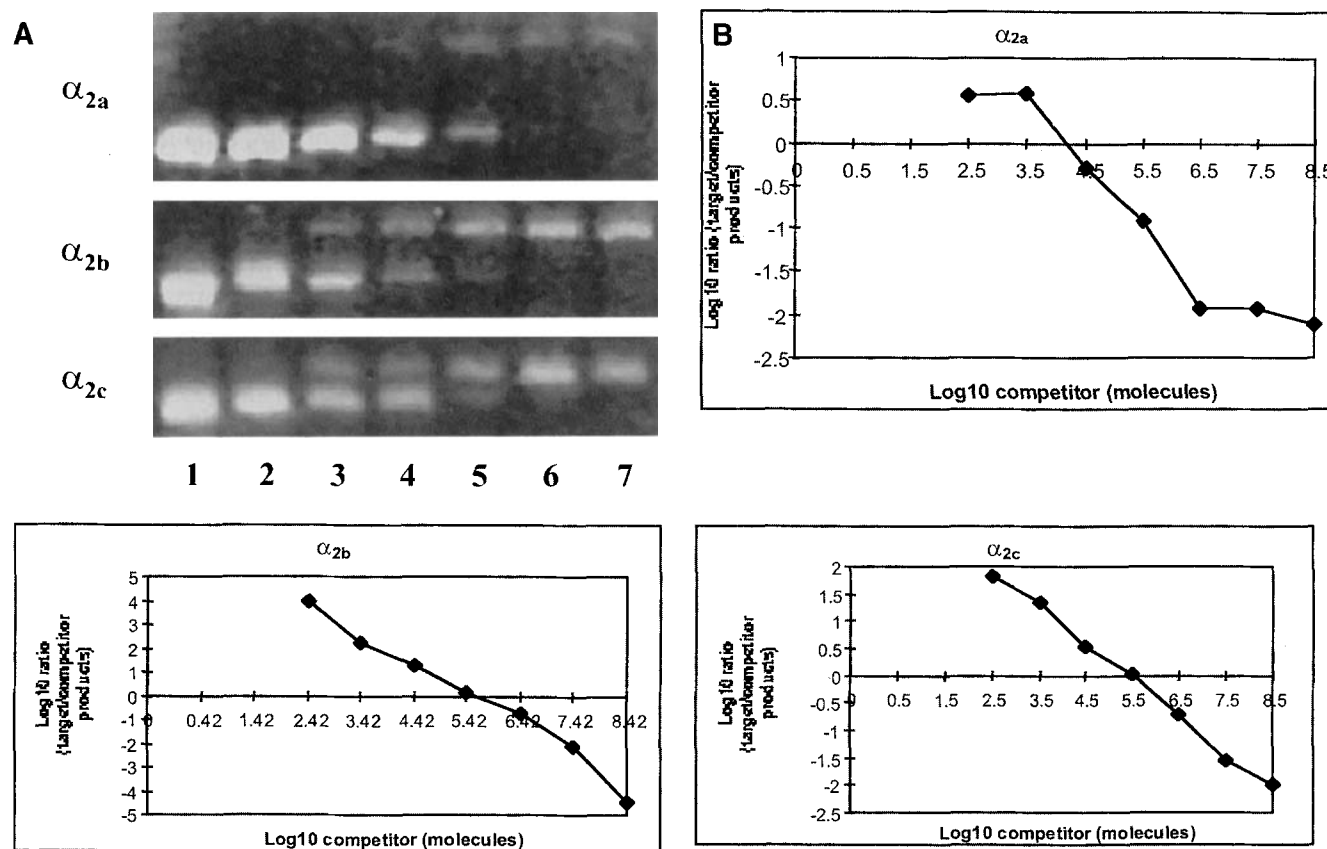

**Fig. 2.**  $\alpha_2$ -Adrenergic receptor ( $\alpha_2$ AR) subtype mRNA in human dorsal root ganglion. (A) Representative agarose gel analysis of  $\alpha_2$ AR subtype (upper band) and corresponding competitor (lower band);  $\alpha_{2a}$ AR = 691 bp,  $\alpha_{2b}$ AR = 612 bp,  $\alpha_{2c}$ AR = 573 bp, and all three competitors = 540 bp. Lanes 1–7 correspond to serial dilutions of competitor present in the reaction starting from  $10^4$  to  $10^7$  molecules (see Materials and Methods). Each competitive reverse transcription polymerase chain reaction contains  $0.5 \mu\text{g}$  total cellular RNA from dorsal root ganglion (cervical level). (B) After correcting for the difference in size between target and competitor (i.e., target band intensity divided by the ratio of target size to competitor size),  $\log_{10}$  ratio of target and competitor products (y-axis) was graphed as a function of the  $\log_{10}$  of the initial amount of competitor molecules (x-axis) present in the reactions. The amount of initial target molecules present (the x-intercept for  $y = 0$ ) was determined for each  $\alpha_2$ AR subtype in each set of reactions.

was not present, reactions were performed without RT; these reactions yielded no product. Initial qualitative  $\alpha_2$ AR RT-PCRs showed that all three  $\alpha_2$ AR subtype mRNAs are capable of being amplified from human DRG; therefore, quantitative competitive RT-PCRs were performed for all three  $\alpha_2$ AR subtypes.

*Quantitative Competitive Reverse Transcription Polymerase Chain Reaction to Determine  $\alpha_2$ AR Subtype Expression in Human Dorsal Root Ganglia*

Quantitative competitive RT-PCR was used to determine relative  $\alpha_2$ AR subtype mRNA expression in human DRG. Amplification efficiency was equal for each  $\alpha_2$ AR target and its corresponding competitor (fig. 1). A representative competitive PCR (agarose gel and quantita-

tion) for all three  $\alpha_2$ AR subtypes in the same DRG is shown in figure 2. Summative results from quantitative competitive RT-PCR for all patients revealed the presence of all three  $\alpha_2$ AR subtypes in human DRG (table 3). Although total overall expression of  $\alpha_2$ AR is low, it is reproducible and present at all levels of human spinal cord. Although evaluation of table 3 suggests that  $\alpha_2$ AR subtype mRNA expression may vary between levels, limitations in sample size (28 DRG samples from four distinct levels of spinal cord) provide only enough statistical power to compare  $\alpha_2$ AR subtype mRNA expression overall in human DRG (results pooled from all levels of human spinal cord). Overall,  $\alpha_{2b}$  and  $\alpha_{2c}$ AR mRNA predominate in human DRG, accounting for more than 95% of  $\alpha_2$ AR mRNA in DRG at all spinal cord levels ( $P <$

**Table 3.  $\alpha_2$ AR mRNA Expression in Human DRG at Various Spinal Cord Levels**

| Spinal Cord Level | $\alpha_{2a}$ (%) | $\alpha_{2b}$ (%) | $\alpha_{2c}$ (%) | $\alpha_2$ mRNA Molecules (All Subtypes) per $\mu$ g Total RNA |
|-------------------|-------------------|-------------------|-------------------|----------------------------------------------------------------|
| Cervical          | 0.61 (0.01–3.7)   | 66 (57–86)        | 34 (14–39)        | $8.4 \times 10^5$ ( $0.64$ – $13 \times 10^5$ )                |
| Thoracic          | 2.6 (1.3–3.3)     | 49 (35–60)        | 48 (38–62)        | $8.2 \times 10^5$ ( $3.3$ – $13 \times 10^5$ )                 |
| Lumbar            | 2.0 (0.19–3.2)    | 41 (29–58)        | 56 (40–67)        | $3.3 \times 10^5$ ( $2.9$ – $13 \times 10^5$ )                 |
| Sacral            | 2.0 (1.8–3.5)     | 54 (29–58)        | 45 (40–67)        | $7.1 \times 10^5$ ( $2.9$ – $9.6 \times 10^5$ )                |

Data are reported as percent total  $\alpha_2$ AR mRNA present in human DRG at the appropriate spinal cord level or as absolute  $\alpha_2$  mRNA molecules (all subtypes) per  $\mu$ g total RNA. Because data are not distributed normally, the median value for each  $\alpha_2$ AR mRNA subtype is shown, with the interquartile range given in parenthesis.

n = 7 patients.

$\alpha_2$ AR =  $\alpha_2$ -adrenergic receptor; DRG = dorsal root ganglion.

0.001). Although there is a trend toward overall  $\alpha_{2b}$  >  $\alpha_{2c}$  mRNA expression, it does not reach statistical significance; this is not surprising, because evaluation of table 3 reveals  $\alpha_{2b}$  >  $\alpha_{2c}$  only at cervical and sacral spinal cord levels. These results contrast with our previously reported  $\alpha_2$ AR mRNA expression in human spinal cord, where  $\alpha_{2a}$   $\approx$   $\alpha_{2b}$  mRNA predominates at all spinal cord levels, with  $\alpha_{2c}$ AR mRNA present only in very small quantities in the lumbar region.<sup>25</sup>

## Discussion

This study is the first to describe  $\alpha_2$ AR subtype mRNA heterogeneity in human DRG. Overall expression of  $\alpha_2$ AR mRNA in DRG is low but reproducible.  $\alpha_{2b}$  and  $\alpha_{2c}$ AR subtypes predominate ( $\alpha_{2b}$   $\approx$   $\alpha_{2c}$ ), accounting for 95% of the total  $\alpha_2$ AR mRNA in DRG at all levels of human spinal cord. Although ribonuclease protection assays are generally considered the gold standard for quantitating mRNA levels, ribonuclease protection is not as sensitive as RT-PCR in analyzing low levels of RNA. A potential drawback to RT-PCR is the issue of reproducibility for quantitation. In the current study, we addressed this issue by strictly implementing competitive RT-PCR conditions; similarity in the percentage of  $\alpha_2$ AR subtype in RNA among patients gives us confidence in our results. Our results in human DRG  $\alpha_2$ AR subtype expression contrast with mRNA expression in both human spinal cord and rat DRG; therefore, it is important to evaluate each of these tissues in more detail.

Although  $\alpha_2$ AR agonists have been used clinically to treat pain, their exact site or sites of action remain to be determined. Potential sites of action include brain, spinal cord, DRG, and sensory neurons. In knockout mice, the  $\alpha_{2a}$ AR has been linked to nociception,<sup>21,35</sup> although some  $\alpha_{2b}$  or  $\alpha_{2c}$ ARs may also be present.<sup>35</sup> These later findings are bolstered by the presence of predominantly

$\alpha_{2a}$  and  $\alpha_{2c}$ ARs mRNA and protein in rat spinal cord.<sup>26,27,36,37</sup> In rat spinal cord,  $\alpha_{2a}$ AR protein is colocalized with afferent substance P-containing neurons, whereas  $\alpha_{2c}$ ARs are present on spinal interneurons.<sup>38</sup> Although animal models classically have been used to evaluate nociceptive pathways, species differences in spinal cord adrenergic receptor expression may limit extrapolation of results to humans.  $\alpha$ -Adrenergic receptor subtypes in human spinal cord have been evaluated by several investigators, including us.<sup>25,28,39</sup> Human spinal cord  $\alpha_2$ AR distribution is limited to gray matter, ventral more than dorsal, with the following general regional abundance: sacral > cervical > thoracic = lumbar.<sup>25</sup> Cell bodies containing  $\alpha_2$ AR mRNA are located in intermediolateral (thoracic and lumbar) and intermediate (sacral) cell columns (lamina VII), the dorsal nucleus of Clarke (thoracic and lumbar), and at all levels in sensory dorsal horn laminae I, II, III, IV, and V and motor ventral horn lamina IX.<sup>25</sup> In terms of  $\alpha_2$ AR subtype mRNA distribution,  $\alpha_{2a}$  and  $\alpha_{2b}$ AR mRNAs predominate at all sites in human spinal cord, with  $\alpha_{2c}$ AR mRNA present at only a few locations restricted to the lumbar spinal cord<sup>25</sup>;  $\alpha_{2a}$ ARs predominate *via* ligand binding; however, because these studies used spinal cord homogenate membranes, nothing can be stated regarding regional localization of  $\alpha_2$ AR subtype protein.<sup>28</sup>

To understand the role of  $\alpha_2$ ARs in human DRG, it is important to remember that the portion of  $\alpha_2$ AR subtype mRNAs in DRG cells translated into protein are then transported to the spinal cord dorsal horn. These receptors constitute the population of presynaptic  $\alpha_2$ ARs on primary dorsal horn afferent neurons, representing approximately 20% of all dorsal horn  $\alpha_2$ ARs.<sup>29</sup> Although activation of presynaptic  $\alpha_2$ ARs, including those originating in DRG, has been associated with neuronal inhibition,<sup>18</sup> activation of DRG neurons by norepinephrine has also been reported to cause both depolarization and

hyperpolarization.<sup>40-42</sup> Norepinephrine-mediated suppression of afferent dorsal horn signaling is a known mechanism for spinal cord inhibition of nociceptive input to the brain.<sup>43,44</sup> Although the presynaptic location of DRG-generated  $\alpha_2$ ARs in spinal cord is clear, spinal cord dorsal horn-generated  $\alpha_2$ ARs may be presynaptic or postsynaptic, with postsynaptic locations on spinal cord dorsal horn interneurons or neurons directed to more rostral locations. The significance of differences in presynaptic *versus* postsynaptic  $\alpha_2$ AR subtype distribution between DRG and spinal cord dorsal horn for the processing of spinal cord pathways is not understood.

In terms of receptors involved in pain, rat models have been used to determine specific  $\alpha_2$ AR subtypes in DRG in the absence or presence of neuropathic pain. Cho *et al.*<sup>45</sup> described  $\alpha_{2c} \gg \alpha_{2a} \gg \alpha_{2b}$  AR subtype mRNA DRG expression in control rats, compared with increased  $\alpha_{2a}$  and decreased  $\alpha_{2c}$  mRNA expression in a model of neuropathic pain. These findings are supported by Nicholas *et al.*,<sup>27</sup> who also described  $\alpha_{2a}$  and  $\alpha_{2c}$  (and absence of  $\alpha_{2b}$ ) mRNA in rat DRG. In contrast, Gold *et al.*<sup>46</sup> reported all three subtypes present in rat DRG,  $\alpha_{2b}$  and  $\alpha_{2c}$  AR mRNAs using *in situ* PCR and  $\alpha_{2a}$  protein using a specific polyclonal antibody. In another interesting study, Graham *et al.*<sup>47</sup> demonstrated that the  $\alpha_2$ AR subtype involved in rat pain is species dependent, with  $\alpha_{2b} \gg \alpha_{2a}$  ARs involved in mediating hot-plate responses in Harlan rats but neither subtype involved in Sasco rats; in contrast,  $\alpha_{2a}$  AR and  $\alpha_{2b}$  AR both are important in nociceptive responses in the tail-flick test. In terms of human DRG, data from the current study shows that  $\alpha_{2b}$  and  $\alpha_{2c}$  AR subtype mRNAs predominate ( $\alpha_{2b} \approx \alpha_{2c}$ ) in human DRG at all spinal cord levels. Compared with rat DRG, these findings suggest significant species and subtype heterogeneity in DRG  $\alpha_2$ AR subtype expression. Development of highly sensitive and specific  $\alpha_2$ AR subtype antibodies and ligands are necessary to further clarify the relation between  $\alpha_2$ AR mRNA and protein in human spinal cord dorsal horn and DRG; such information may contribute to understanding nociception at the DRG-spinal cord level. Furthermore, such studies also may contribute to our understanding of  $\alpha_2$ ARs in modulating other neural pathways.

We demonstrate the presence and heterogeneity of  $\alpha_2$ AR subtype mRNA in human DRG ( $\alpha_{2b} \approx \alpha_{2c}$ ). In addition,  $\alpha_2$ AR subtype mRNA in DRG contrasts with that found in human and rat spinal cord dorsal horn and rat DRG. If confirmed at a protein level, these findings provide an additional step in unraveling mechanisms involved in complex neural pathways such as pain.

## References

1. Bloor BC, Flacke WE: Reduction in halothane anesthetic requirement by clonidine, an alpha-adrenergic agonist. *Anesth Analg* 1982; 61:741-5
2. Maze M, Vickery RG, Merlone SC, Gaba DM: Anesthetic and hemodynamic effects of the alpha<sub>2</sub>-adrenergic agonist, azepexole, in isoflurane-anesthetized dogs. *ANESTHESIOLOGY* 1988; 68:689-94
3. Doze VA, Chen BX, Maze M: Dexmedetomidine produces a hypnotic-anesthetic action in rats via activation of central alpha-2 adrenoceptors. *ANESTHESIOLOGY* 1989; 71:75-9
4. Vickery RG, Sheridan BC, Segal IS, Maze M: Anesthetic and hemodynamic effects of the stereoisomers of medetomidine, an  $\alpha_2$ -adrenergic agonist, in halothane-anesthetized dogs. *Anesth Analg* 1988; 67:611-5
5. Flacke JW, Bloor BC, Flacke WE, Wong D, Dazza S, Stead SW, Laks H: Reduced narcotic requirement by clonidine with improved hemodynamic and adrenergic stability in patients undergoing coronary bypass surgery. *ANESTHESIOLOGY* 1987; 67:11-9
6. Ghignone M, Quintin L, Duke PC, Kehler CH, Calvillo O: Effects of clonidine on narcotic requirements and hemodynamic response during induction of fentanyl anesthesia and endotracheal intubation. *ANESTHESIOLOGY* 1986; 64:36-42
7. Ghignone M, Noe C, Calvillo O, Quintin L: Anesthesia for ophthalmic surgery in the elderly: The effects of clonidine on intraocular pressure, perioperative hemodynamics, and anesthesia requirement. *ANESTHESIOLOGY* 1988; 68:707-16
8. Eisenach JC, DeKock M, Klimscha W:  $\alpha_2$ -Adrenergic agonists for regional anesthesia—A clinical review of clonidine (1984-1995). *ANESTHESIOLOGY* 1996; 85:655-74
9. Eisenach JC, Rauch RL, Buzzanell C, Lysak SZ: Epidural clonidine analgesia for intractable cancer pain: Phase I. *ANESTHESIOLOGY* 1989; 71:647-52
10. Coombs DW, Saunders RL, Lachance D: Intrathecal morphine tolerance: Use of intrathecal clonidine, DADLE, and intraventricular morphine. *ANESTHESIOLOGY* 1985; 62:358-63
11. Tamsen A, Gordh T: Epidural clonidine produces analgesia. *Lancet* 1984; 2:231-2
12. Kobilka BK, Matsui H, Kobilka TS, Yang-Feng TL, Francke U, Caron MG, Lefkowitz RJ, Regan JW: Cloning, sequencing, and expression of the gene coding for the human platelet  $\alpha_2$ -adrenergic receptor. *Science* 1987; 238:650-6
13. Lomasney JW, Lorenz W, Allen LF, King K, Regan JW, Yang-Feng TL, Caron MG, Lefkowitz RJ: Expansion of the  $\alpha_2$ -adrenergic receptor family: Cloning and characterization of a human  $\alpha_2$ -adrenergic receptor subtype, the gene for which is located on chromosome 2. *Proc Natl Acad Sci U S A* 1990; 87:5094-8
14. Berkowitz DE, Price DT, Bello EA, Page SO, Schwinn DA: Localization of mRNA for three distinct  $\alpha_2$ -adrenergic receptor subtypes in human tissues: Evidence for species heterogeneity and implications for human pharmacology. *ANESTHESIOLOGY* 1994; 81:1235-44
15. Maze M, Tranquilli W: Alpha-2 adrenoceptor agonists: Defining the role in clinical anesthesia. *ANESTHESIOLOGY* 1991; 74:581-605
16. Abdulla FA, Smith PA: Ectopic alpha<sub>2</sub>-adrenoceptors couple to N-type Ca<sup>2+</sup> channels in axotomized rat sensory neurons. *J Neurosci* 1997; 17:1633-41
17. Attali B, Nah SY, Vogel Z: Phorbol ester pretreatment desensitizes the inhibition of Ca<sup>2+</sup> channels induced by kappa-opiate, alpha<sub>2</sub>-adrenergic, and muscarinic receptor agonists. *J Neurochem* 1991; 57:1803-6



18. Holz GGT, Kream RM, Spiegel A, Dunlap K: G proteins couple alpha-adrenergic and GABA<sub>B</sub> receptors to inhibition of peptide secretion from peripheral sensory neurons. *J Neurosci* 1989; 9:657-66
19. Li ZW, Wang AJ, Leng M, Yang XP: Noradrenaline depolarization and hyperpolarization mediated by alpha-adrenergic receptors in the soma of dorsal root ganglion neurons. *J Tongji Med Univ* 1988; 8:144-9
20. Supowit S, Hallman D, Zhao H, DiPette D:  $\alpha_2$ -Adrenergic receptor activation inhibits calcitonin gene-related peptide expression in cultured dorsal root ganglia neurons. *Brain Res* 1998; 782:184-93
21. MacMillan LB, Hein L, Smith MS, Piascik MT, Limbird LE: Central hypotensive effects of the  $\alpha_{2a}$ -adrenergic receptor subtype. *Science* 1996; 273:801-3
22. MacMillan LB, Lakhani PP, Hein L, Piascik M, Guo TZ, Lovinger D, Maze M, Limbird LE: In vivo mutation of the alpha 2A-adrenergic receptor by homologous recombination reveals the role of this receptor subtype in multiple physiological processes. *Adv Pharmacol* 1998; 42:493-6
23. Link RE, Desai K, Hein L, Stevens ME, Chruscinski A, Bernstein D, Barsh GS, Kobilka BK: Cardiovascular regulation in mice lacking  $\alpha_2$ -adrenergic receptor subtypes b and c. *Science* 1996; 273:803-5
24. Sallinen J, Link RE, Haapalinna A, Viitamaa T, Kulatunga M, Sjöholm B, MacDonald E, Pelto-Huikko P, Leino T, Barsh GS, Kobilka BK, Scheinin M: Genetic alteration of  $\alpha_2$ -adrenoceptor expression in mice: Influence of locomotor, hypothermic, and neurochemical effects of dexmedetomidine, a subtype-nonselective  $\alpha_2$ -adrenoceptor agonist. *Mol Pharmacol* 1997; 51:36-46
25. Stafford-Smith M, Schambra UB, Wilson KH, Page SO, Hulette C, Light AR, Schwinn DA:  $\alpha_2$ -Adrenergic receptors in human spinal cord: Specific localized expression of mRNA encoding  $\alpha_2$ -adrenergic subtypes at four distinct levels. *Mol Brain Res* 1995; 34:109-17
26. Zeng DW, Lynch KR: Distribution of  $\alpha_2$ -adrenergic receptor mRNAs in the rat CNS. *Mol Brain Res* 1991; 10:219-25
27. Nicholas AP, Pieribone V, Hokfelt T: Distributions of mRNAs for alpha-2 adrenergic receptor subtypes in rat brain: An *in situ* hybridization study. *J Compar Neurol* 1993; 328:575-94
28. Lawhead RG, Blaxall HS, Bylund DB:  $\alpha_2A$  is the predominant  $\alpha_2$  adrenergic receptor subtype in human spinal cord. *ANESTHESIOLOGY* 1992; 77:983-91
29. Howe JR, Yaksh TL, Go VLW: The effect of unilateral dorsal root ganglionectomies or ventral rhizotomies on  $\alpha_2$ -adrenoceptor binding to, and the substance P, enkephalin, and neurotensin content of, the cat lumbar spinal cord. *Neuroscience* 1987; 21:385-94
30. Chomczynski P, Sacchi N: Single-step method of RNA isolation by acid guanidinium thiocyanate-phenol-chloroform extraction. *Anal Biochem* 1987; 162:156-9
31. Eason MG, Liggett SB: Human  $\alpha_2$ -adrenergic receptor subtype distribution: Widespread and subtype selective expression of  $\alpha_2C10$ ,  $\alpha_2C4$ ,  $\alpha_2C2$  mRNA in multiple tissues. *Mol Pharmacol* 1993; 44:70-5
32. Haun RS, Serventi IM, Moss J: Rapid, reliable ligation-independent cloning of PCR products using modified plasmid vector. *BioTechniques* 1992; 13:515-8
33. Liang KY, Zeger SL: Longitudinal data analysis using generalized linear models. *Biometrika* 1986; 73:13-22
34. Zeger SL, Liang KY: Longitudinal data analysis for discrete and continuous outcomes. *Biometrics* 1986; 42:121-30
35. Guo TZ, Davies MF, Kingery WS, Patterson AJ, Limbird LE, Maze M: Nitrous oxide produces antinociceptive response *via*  $\alpha_{2B}$  and/or  $\alpha_{2C}$  adrenoceptor subtypes in mice. *ANESTHESIOLOGY* 1999; 90:470-6
36. Uhlen S, Wikberg JES: Rat spinal cord alpha2-adrenoceptors are of the alpha2A-subtype: Comparison with alpha2A- and alpha2B-adrenoceptors in rat spleen, cerebral cortex and kidney using 3H-RX821002 ligand binding. *Pharmacol Toxicol* 1991; 69:341-50
37. Uhlen S, Xia Y, Chhajlani V, Felder CC, Wikberg JE: 3H-MK 912 binding delineates two alpha2-adrenoceptor subtypes in rat CNS one of which is identical with the cloned pA2d alpha 2-adrenoceptor. *Br J Pharmacol* 1992; 106:986-95
38. Stone LS, Broberger C, Vulchanova L, Wilcox GL, Hokfelt T, Riedl MS, Elde R: Differential distribution of alpha2A and alpha2C adrenergic receptor immunoreactivity in the rat spinal cord. *J Neurosci* 1998; 18:5928-37
39. Stafford-Smith M, Shambra U, Wilson K, Page S, Schwinn D:  $\alpha_1$ -Adrenergic receptors in human spinal cord: Specific localized expression of mRNA encoding  $\alpha_1$ -adrenergic subtypes at four distinct levels. *Mol Brain Res* 1999; 63:254-61
40. Wang AJ, Hu MX, Li ZW: Effect of LH-FSH releasing hormone on the sensitivity of cholinergic and adrenergic receptors in toad spinal ganglion neurons. *Chung Kuo Yao Li Hsueh Pao* 1991; 12:445-8
41. Wang AK, Li ZW, Hu MX, Leng M: Ionic basis of noradrenaline depolarization and hyperpolarization in toad dorsal root ganglia neurons. *J Tongji Med Univ* 1988; 8:193-7
42. Chen Y, Wang AJ, Ma YL: Effects of morphine on sensitivities of alpha-adrenoceptors in toad spinal ganglion neurons. *Chung Kuo Yao Li Hsueh Pao* 1993; 14:417-20
43. Peng YB, Lin Q, Willis WD: Involvement of alpha-2 adrenoceptors in the periaqueductal gray-induced inhibition of dorsal horn cell activity in rats. *J Pharmacol Exp Ther* 1996; 278:125-35
44. Millan MJ: The role of descending noradrenergic and serotonergic pathways in the modulation of nociception. Focus on Receptor Multiplicity. Edited by Dickenson A, Besson JM. Germany, Springer-Verlag, 1997, pp 385-446
45. Cho HJ, Kim DS, Lee NH, Kim JK, Lee KM, Han KS, Kang YN, Kim KJ: Changes in the alpha 2-adrenergic receptor subtypes gene expression in rat dorsal root ganglion in an experimental model of neuropathic pain. *Neuroreport* 1997; 8:3119-22
46. Gold MS, Dastmalchi S, Levine JD: Alpha 2-adrenergic receptor subtypes in rat dorsal root and superior cervical ganglion neurons. *Pain* 1997; 69:179-90
47. Graham BA, Hammond DL, Proudfit HK: Differences in the antinociceptive effects of alpha-2 adrenoceptor agonists in two substrains of Sprague-Dawley rats. *J Pharmacol Exp Ther* 1997; 283:511-9
